# Supplementary material for: Age Differences in Attitudes towards Older People in Poland
Source: MDPI journal article supplement (doi:10.3390/ijerph18136869), 2021-06-26
Supplement: s1 [file s1]

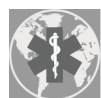

**Table S2a.** Results of the Satisfaction with Life Scale (SWLS) of young people and seniors.

| Statement                                                   | Group | Points—answer/number of people |       |                |                            |                   |                   |                   |
|-------------------------------------------------------------|-------|--------------------------------|-------|----------------|----------------------------|-------------------|-------------------|-------------------|
|                                                             |       | 7                              | 6     | 5              | 4                          | 3                 | 2                 | 1                 |
|                                                             |       | Strongly agree                 | Agree | Slightly agree | Neither agree nor disagree | Slightly disagree | Disagree          | Strongly disagree |
| In most ways my life is close to my ideal                   | I     | 12                             | 29    | 58             | 38                         | 22                | 14                | 4                 |
|                                                             | II    | 2                              | 13    | 55             | 39                         | 40                | 26                | 2                 |
| The conditions of my life are excellent                     | I     | 20                             | 54    | 67             | 17                         | 9                 | 6                 | 4                 |
|                                                             | II    | 6                              | 42    | 52             | 34                         | 32                | 10                | 1                 |
| I am satisfied with my life                                 | I     | 14                             | 60    | 59             | 22                         | 6                 | 10                | 6                 |
|                                                             | II    | 7                              | 48    | 54             | 40                         | 21                | 7                 | 0                 |
| So far I have gotten the important things I want in life    | I     | 8                              | 55    | 43             | 36                         | 15                | 10                | 10                |
|                                                             | II    | 4                              | 55    | 62             | 27                         | 17                | 10                | 2                 |
| If I could live my life over, I would change almost nothing | I     | 16                             | 21    | 43             | 15                         | 49                | 20                | 13                |
|                                                             | II    | 7                              | 23    | 30             | 21                         | 57                | 34                | 5                 |
| Average degree of satisfaction with life                    |       | Group I                        |       |                |                            |                   | 23.2 ± 6.5 points |                   |
|                                                             |       | Group II                       |       |                |                            |                   | 21.8 ± 5.1 points |                   |
| Minimum points                                              |       | Group I                        |       |                |                            |                   | 5                 |                   |
|                                                             |       | Group II                       |       |                |                            |                   | 10                |                   |
| Maximum points                                              |       | Group I                        |       |                |                            |                   | 35                |                   |
|                                                             |       | Group II                       |       |                |                            |                   | 34                |                   |
| Calculated sten value                                       |       | Group I                        |       |                |                            |                   | 6.6 ± 2.3 sten    |                   |
|                                                             |       | Group II                       |       |                |                            |                   | 5.96 ± 1.8        |                   |
| Minimum sten                                                |       | Group I                        |       |                |                            |                   | 1                 |                   |
|                                                             |       | Group II                       |       |                |                            |                   | 2                 |                   |
| Maximum sten                                                |       | Group I                        |       |                |                            |                   | 10                |                   |
|                                                             |       | Group II                       |       |                |                            |                   | 10                |                   |

**Table S3a.** Results on the Self-Assessment Scale of Own Person.

| Item                                                            | Points—reply/group/number of people |    |          |     |            |    |         |    |          |    |
|-----------------------------------------------------------------|-------------------------------------|----|----------|-----|------------|----|---------|----|----------|----|
|                                                                 | 4 points                            |    | 3 points |     | 2 points   |    | 1 point |    | 0 points |    |
|                                                                 | Very often                          |    | Often    |     | Some-times |    | Rarely  |    | Never    |    |
|                                                                 | I                                   | II | I        | II  | I          | II | I       | II | I        | II |
| I wish my friends would continue to support me                  | 77                                  | 53 | 60       | 111 | 28         | 11 | 8       | 2  | 4        | 0  |
| I still feel anxious even if I have acted appropriately         | 44                                  | 36 | 53       | 88  | 58         | 50 | 22      | 3  | 0        | 0  |
| I am worried about my future                                    | 48                                  | 39 | 44       | 90  | 57         | 44 | 24      | 4  | 4        | 0  |
| Most of my friends hate me                                      | 4                                   | 13 | 11       | 22  | 37         | 83 | 89      | 59 | 36       | 0  |
| I have less initiative than others                              | 14                                  | 21 | 41       | 79  | 63         | 72 | 49      | 5  | 10       | 0  |
| I'm nervous about my mental state                               | 26                                  | 18 | 29       | 76  | 64         | 62 | 42      | 21 | 16       | 0  |
| I'm afraid to look like a fool                                  | 56                                  | 21 | 46       | 79  | 47         | 49 | 24      | 28 | 4        | 0  |
| Others look so much better than me                              | 38                                  | 29 | 41       | 76  | 64         | 60 | 34      | 12 | 0        | 0  |
| I'm afraid to speak in public when I have something to say      | 50                                  | 57 | 48       | 55  | 51         | 46 | 26      | 19 | 2        | 0  |
| I often make mistakes                                           | 17                                  | 20 | 42       | 113 | 98         | 44 | 20      | 0  | 0        | 0  |
| I can't speak nicely or correctly                               | 16                                  | 18 | 38       | 63  | 54         | 65 | 55      | 31 | 14       | 0  |
| I don't believe in my own strength                              | 29                                  | 17 | 41       | 72  | 53         | 80 | 46      | 8  | 8        | 0  |
| I don't want my actions to be better than the actions of others | 4                                   | 7  | 7        | 61  | 49         | 81 | 79      | 28 | 38       | 0  |
| I'm too modest                                                  | 10                                  | 59 | 44       | 74  | 77         | 35 | 34      | 9  | 12       | 0  |
| I have no purpose in life                                       | 9                                   | 18 | 24       | 41  | 45         | 84 | 53      | 34 | 46       | 0  |

|                                                                          |    |    |    |    |    |          |                     |    |    |   |
|--------------------------------------------------------------------------|----|----|----|----|----|----------|---------------------|----|----|---|
| Many people have a bad opinion of me                                     | 8  | 10 | 15 | 45 | 50 | 101      | 90                  | 21 | 14 | 0 |
| I have no one to share my thoughts with                                  | 10 | 26 | 22 | 52 | 36 | 70       | 55                  | 29 | 54 | 0 |
| People expect too much from me                                           | 22 | 53 | 27 | 69 | 60 | 52       | 62                  | 3  | 6  | 0 |
| People are usually not interested in my achievements                     | 11 | 42 | 29 | 68 | 83 | 62       | 38                  | 5  | 16 | 0 |
| I'm easily embarrassed                                                   | 31 | 52 | 60 | 56 | 53 | 59       | 33                  | 10 | 0  | 0 |
| I feel as if many people do not understand me                            | 23 | 43 | 50 | 83 | 63 | 49       | 37                  | 2  | 4  | 0 |
| I feel threatened                                                        | 6  | 21 | 34 | 52 | 49 | 83       | 68                  | 21 | 20 | 0 |
| I often get nervous unnecessarily                                        | 49 | 76 | 63 | 63 | 47 | 32       | 14                  | 6  | 4  | 0 |
| I feel bad when I walk into a room full of people                        | 28 | 42 | 44 | 49 | 55 | 56       | 44                  | 30 | 6  | 0 |
| I feel uncomfortable                                                     | 27 | 29 | 41 | 69 | 65 | 69       | 40                  | 10 | 4  | 0 |
| People talk about me behind my back                                      | 18 | 26 | 27 | 74 | 54 | 65       | 64                  | 12 | 14 | 0 |
| I'm convinced that others are doing better than me                       | 28 | 43 | 36 | 77 | 63 | 50       | 46                  | 7  | 4  | 0 |
| I feel guilty for bringing bad luck to others                            | 6  | 0  | 11 | 31 | 23 | 67       | 65                  | 79 | 72 | 0 |
| It annoys me when I start to wonder about how other people feel about me | 14 | 25 | 32 | 54 | 42 | 69       | 73                  | 29 | 16 | 0 |
| I'm not outgoing                                                         | 14 | 20 | 35 | 54 | 64 | 76       | 50                  | 27 | 14 | 0 |
| I only speak up in disputes when I know I'm right                        | 42 | 92 | 73 | 64 | 34 | 19       | 28                  | 2  | 0  | 0 |
| I still think about what others expect of me                             | 27 | 58 | 41 | 64 | 54 | 48       | 51                  | 7  | 4  | 0 |
| Average number of points                                                 |    |    |    |    |    | Group I  | 66.6 ± 22.2 points  |    |    |   |
|                                                                          |    |    |    |    |    | Group II | 85.01 ± 28.3 points |    |    |   |
| Minimum number of points                                                 |    |    |    |    |    | Group I  | 26                  |    |    |   |
|                                                                          |    |    |    |    |    | Group II | 52                  |    |    |   |
| Maximum number of points                                                 |    |    |    |    |    | Group I  | 121                 |    |    |   |
|                                                                          |    |    |    |    |    | Group II | 117                 |    |    |   |

Table S4a. Attitudes of respondents towards older people according to the Kogan scale.

|                                                                                                                   | Average scores<br>on the Kogan<br>scale |                              | <i>p</i> |
|-------------------------------------------------------------------------------------------------------------------|-----------------------------------------|------------------------------|----------|
|                                                                                                                   | Young peo-<br>ple<br>( <i>n</i> = 177)  | Seniors<br>( <i>n</i> = 177) |          |
| Negative attitude                                                                                                 |                                         |                              |          |
| It would probably be better if most old people lived in residential units with people their own age               | 3.6 ± 1.5                               | 2.3 ± 1.3                    | <0.001   |
| There is something different about most people; it's hard to find out what makes them tick                        | 2.9 ± 1.4                               | 3.9 ± 1.1                    | <0.001   |
| Most old people get set in their ways and are unable to change                                                    | 2.1 ± 1.3                               | 4.2 ± 1.2                    | <0.001   |
| Most old people would prefer to quit work as soon as pensions or their children can support them                  | 4.3 ± 1.3                               | 2.7 ± 1.4                    | <0.001   |
| Most old people tend to let their homes become shabby and unattractive                                            | 4.5 ± 1.1                               | 2.8 ± 1.3                    | <0.001   |
| It's foolish to claim that wisdom comes with age                                                                  | 3.5 ± 1.7                               | 3.4 ± 1.4                    | NS       |
| Old people have too much power in business and politics                                                           | 3.4 ± 1.5                               | 3.1 ± 1.2                    | <0.05    |
| Most old people make others feel ill at ease                                                                      | 4.4 ± 1.2                               | 2.99 ± 1.3                   | <0.001   |
| Most old people bore others by their insistence on talking "about the good old days"                              | 4.9 ± 1.3                               | 3.7 ± 1.3                    | <0.001   |
| Most old people spend too much time prying into the affairs of others and giving unsought advice                  | 2.9 ± 1.4                               | 4.1 ± 1.2                    | <0.001   |
| If old people expect to be liked, their first step should be to try to get rid of their irritating faults         | 4.3 ± 1.1                               | 4.1 ± 1.1                    | 0.095    |
| In order to maintain a nice residential neighbourhood, it would be best if too many old people did not live in it | 4.4 ± 1.4                               | 2.95 ± 1.5                   | <0.001   |
| There are a few exceptions, but in general, most old people are pretty much alike                                 | 3.8 ± 1.4                               | 2.6 ± 1.3                    | <0.001   |
| Most old people should be more concerned with their personal appearance; they're too untidy                       | 3.98 ± 1.3                              | 3.6 ± 1.5                    | 0.01     |
| Most old people are irritable, grouchy, and unpleasant                                                            | 4.2 ± 1.3                               | 2.6 ± 1.3                    | <0.001   |
| Most old people are constantly complaining about the behaviour of the younger generation                          | 2.8 ± 1.4                               | 3.5 ± 1.4                    | <0.001   |
| Most old people make excessive demands for love and reassurance more than anyone else                             | 2.6 ± 1.1                               | 4.4 ± 1.1                    | <0.001   |
| Positive attitudes                                                                                                |                                         |                              |          |
| It would probably be better if most people lived in residential units with younger people                         | 3.5 ± 1.4                               | 3.4 ± 1.5                    | NS       |

|                                                                                                                       |            |           |        |
|-----------------------------------------------------------------------------------------------------------------------|------------|-----------|--------|
| Most old people are really no different from anybody else; they're as easy to understand as younger people            | 2.8 ± 1.4  | 3.5 ± 1.3 | <0.001 |
| Most old people are capable of new adjustments when the situation demands it                                          | 2.8 ± 1.4  | 3.6 ± 1.3 | <0.001 |
| Most old people would prefer to continue working just as long as they can instead of being dependent on anybody       | 4.3 ± 1.4  | 3.9 ± 1.5 | <0.001 |
| Most old people can generally be counted on to maintain a clean, attractive home                                      | 3.7 ± 1.3  | 3.6 ± 1.4 | NS     |
| People grow wiser with the coming of old age                                                                          | 3.5 ± 1.5  | 3.8 ± 1.4 | NS     |
| Old people should have power in business and politics                                                                 | 2.5 ± 1.1  | 2.8 ± 1.3 | 0.02   |
| Most old people are very relaxing to be with                                                                          | 3.3 ± 1.3  | 3.1 ± 1.4 | NS     |
| One of the most interesting and entertaining qualities of most old people is their accounts of their past experiences | 4.5 ± 1.1  | 4.1 ± 1.1 | <0.001 |
| Most old people tend to keep to themselves and give advice only when asked                                            | 2.6 ± 1.1  | 2.9 ± 1.2 | 0.022  |
| When you think about it, old people have the same faults as everybody else                                            | 4.6 ± 1.3  | 4.3 ± 1.1 | NS     |
| You can count on finding a nice residential neighbourhood when there is a sizeable number of old people living in it  | 2.9 ± 1.3  | 2.7 ± 1.3 | NS     |
| It is evident that most old people are very different from one another                                                | 3.98 ± 1.4 | 4.4 ± 1.1 | 0.002  |
| Most old people seem quite clean and neat in their personal appearance                                                | 3.6 ± 1.3  | 3.8 ± 1.4 | NS     |
| Most old people are cheerful, agreeable, and good-humoured                                                            | 3.5 ± 1.3  | 2.3 ± 1.3 |        |
| I seldom hear old people complaining about the behaviour of the younger generation                                    | 2.3 ± 1.1  | 3.0 ± 1.4 | <0.001 |
| Most old people need no more love and reassurance than anyone else                                                    | 2.3 ± 1.1  | 2.5 ± 1.3 | NS     |
